# Supplementary material for: A comparison of Chikungunya virus infection, progression, and cytokine profiles in human PMA-differentiated U937 and murine RAW264.7 monocyte derived macrophages
Source: PubMed Central journal article supplement (PMC7067478; doi:10.1371/journal.pone.0230328), 2020-03-12
Supplement: pone.0230328.s001.pdf [file pone.0230328.s001.pdf]

**S1 Table. Primer and Probe Sequences**

|                     | <i>Human</i>                                | <i>Murine</i>                                  |
|---------------------|---------------------------------------------|------------------------------------------------|
| <i>Name</i>         | 5'→3' Nucleotide Sequence                   | 5'→3' Nucleotide Sequence                      |
| <i>IL-1 For</i>     | ATGTCTCTGCAAAGACCCCT                        | CAACCAACAAGTGATATTCTCCATG                      |
| <i>IL-1 Rev</i>     | GGTAGCAGTTTGGGCTTGTGT                       | GATCCACACTCTCCAGCTGCA                          |
| <i>IL-6 For</i>     | ACTCACCTCTTCAGAACGAATTG                     | CTGCAAGAGACTTCCATCCAG                          |
| <i>IL-6 Rev</i>     | CTGCAAGAGACTTCCATCCAG                       | AGTGGTATAGACAGGTCTGTTGG                        |
| <i>IL-10 For</i>    | TACCACCTCCGAAAATGTCA                        | GCTGGACAACATACTGCTAACC                         |
| <i>IL-10 Rev</i>    | CCCAGTCTGAATGCTCATCTG                       | ATTTCCGATAAGGCTTGGCAA                          |
| <i>IFN-α For</i>    | CACTTCTAGACAAATTCTACTG                      | TGAAGGACAGGAAGGACTTTG                          |
| <i>IFN-α Rev</i>    | GGATAGAGTCCACATTCATCAG                      | GAATGAGTCTAGGAGGGTTGT                          |
| <i>IFN-γ For</i>    | CCAACGCAAAGCAATACATGA                       | TCAAGTGGCATAGATGTGGAAGAA                       |
| <i>IFN-γ Rev</i>    | CCTTTTTCGTTCCCTGTTTTA                       | GCTGGACAACATACTGCTAACC                         |
| <i>TNF-α For</i>    | GGAGAAGGGTGACCGACTCA                        | AATTCGAGTGACAAGCCTGTAGC                        |
| <i>TNF-α Rev</i>    | CTGCCAGACTCGGCAA                            | AGTAGACAAGGTACAACCCATCG                        |
| <i>MCP-1 For</i>    | CAGCCAGATGCAATCAATGCC                       | TAAAACCTGGATCGGAACCAAA                         |
| <i>MCP-1 Rev</i>    | TGGAATCCTGAACCCACTTCT                       | GCATTAGCTTCAGATTTACGGGT                        |
|                     | <i>Other</i>                                |                                                |
|                     | 5'→3' Nucleotide Sequence                   |                                                |
| <i>E1 Cloning F</i> | GCAGCAAAGCTTAGAACAGCTAAAGCGGCCAC            | Cloning primers for CHIKV's E1 gene            |
| <i>E1 Cloning R</i> | GCAGCATCTAGACCTGCTGAACGACACGCATAG           |                                                |
| <i>Mxra8-For</i>    | TACACCTGCAACCTGCACC                         |                                                |
| <i>Mxra8-Rev</i>    | ACCTGTTGAGCCTCCTCCAC                        |                                                |
| <i>Mxra8-Pro</i>    | FAM-ACTACTGCCACCTCTACGAGAGCCTGGCCGTCCG-BHQ1 |                                                |
| <i>GapDH-Probe</i>  | Cy3-ATCGGTCGCCTGGTCTGCGCGCCTGCATGGA-BHQ2    | Designed to amplify human and murine sequences |
| <i>GapDH-For</i>    | TGTGGGCATCAATGGATTTGG                       |                                                |
| <i>GapDH-Rev</i>    | ACACCATGTATTCCGGGTCAAT                      |                                                |
| <i>E1 For</i>       | TCGACGCGCCCTCTTTAA                          | CHIKV E1 gene                                  |
| <i>E1 Rev</i>       | ATCGAATGCACCCGACACT                         |                                                |
| <i>E1 Probe</i>     | FAM-ACCAGCCTGCACCCATTCTCAGAC-TAM            |                                                |
