# Supplementary material for: A comparison of Chikungunya virus infection, progression, and cytokine profiles in human PMA-differentiated U937 and murine RAW264.7 monocyte derived macrophages
Source: PubMed Central journal article supplement (PMC7067478; doi:10.1371/journal.pone.0230328), 2020-03-12
Supplement: pone.0230328.s002.pdf [file pone.0230328.s002.pdf]

**S2 Table. Statistical Analysis of the Results**

**Figure 1**

| <i>Hpi</i> | Mean PMA-U937 MOI=5 | Mean RAW264.7 MOI=5   | SE of Difference | P-value   | Adjusted P-value |
|------------|---------------------|-----------------------|------------------|-----------|------------------|
| 0          | 2500000             | 2500000               | 60310            | >0.999999 | >0.999999        |
| 2          | 250                 | 250                   | 31.62            | >0.999999 | >0.999999        |
| 4          | 200                 | 200                   | 60.01            | >0.999999 | >0.999999        |
| 6          | 200                 | 200                   | 58.9             | >0.999999 | >0.999999        |
| 8          | 700000              | 47000                 | 116062           | 0.000038  | 0.000341         |
| 16         | 8000000             | 800000                | 1547869          | 0.000266  | 0.001861         |
| 24         | 24500000            | 3500000               | 5955456          | 0.002804  | 0.016707         |
| 36         | 52000000            | 5500000               | 9676521          | 0.000194  | 0.001552         |
| 48         | 32200000            | 2900000               | 58582423         | 0.623778  | 0.992463         |
|            | Mean U937 MOI=0.1   | Mean RAW264.7 MOI=0.1 | SE of Difference | P-value   | Adjusted P-value |
| 0          | 50000               | 50000                 | 3255428          | >0.999999 | >0.999999        |
| 2          | 500                 | 50                    | 3255428          | 0.99989   | >0.999999        |
| 4          | 50                  | 50                    | 3255428          | >0.999999 | >0.999999        |
| 6          | 50                  | 50                    | 3255428          | >0.999999 | >0.999999        |
| 8          | 2230                | 125                   | 3255428          | 0.999485  | >0.999999        |
| 16         | 47000               | 5500                  | 3255428          | 0.989847  | >0.999999        |
| 24         | 1150000             | 101200                | 3255428          | 0.747791  | 0.999935         |
| 36         | 7500000             | 420000                | 3255428          | 0.031276  | 0.224464         |
| 48         | 12000000            | 1100000               | 3255428          | 0.001038  | 0.009303         |

**Figure 2A**

| <i>Hpi</i> | Mean PMA-U937 MOI=5 | Mean RAW264.7 MOI=5   | SE of Difference | P-value   | Adjusted P-value |
|------------|---------------------|-----------------------|------------------|-----------|------------------|
| 0          | 25000000            | 25000000              | 2126766          | >0.999999 | >0.999999        |
| 2          | 150                 | 199                   | 2126766          | 0.999982  | >0.999999        |
| 4          | 120                 | 145                   | 2126766          | 0.999991  | >0.999999        |
| 6          | 160                 | 89                    | 2126766          | 0.999973  | >0.999999        |
| 8          | 7000000             | 60000                 | 2126766          | 0.001621  | 0.008081         |
|            |                     |                       |                  |           |                  |
|            | Mean U937 MOI=0.1   | Mean RAW264.7 MOI=0.1 | SE of Difference | P-value   | Adjusted P-value |
| 0          | 500000              | 500000                | 4795             | >0.999999 | >0.999999        |
| 2          | 188                 | 58                    | 48.41            | 0.01626   | 0.078697         |
| 4          | 55                  | 75                    | 30.41            | 0.520147  | 0.946981         |
| 6          | 111                 | 114                   | 59.46            | 0.960388  | 0.998431         |
| 8          | 1900                | 70                    | 8800             | 0.837892  | 0.99574          |

**Figure 2B**

| <i>Hpi</i> | Mean PMA-U937 MOI=5 | Mean RAW264.7 MOI=5   | SE of Difference | P-value   | Adjusted P-value |
|------------|---------------------|-----------------------|------------------|-----------|------------------|
| 0          | 25000000            | 25000000              | 69633247         | >0.999999 | >0.999999        |
| 8          | 7000000             | 60000                 | 69633247         | 0.920818  | 0.99373          |
| 12         | 40000000            | 800000                | 69633247         | 0.574782  | 0.923116         |
| 24         | 170000000           | 3500000               | 69633247         | 0.018748  | 0.090291         |
| 36         | 190000000           | 14000000              | 69633247         | 0.01312   | 0.076182         |
| 48         | 120000000           | 11000000              | 69633247         | 0.120793  | 0.402463         |
|            |                     |                       |                  |           |                  |
|            | Mean U937 MOI=0.1   | Mean RAW264.7 MOI=0.1 | SE of Difference | P-value   | Adjusted P-value |
| 0          | 500000              | 500000                | 3685022          | >0.999999 | >0.999999        |
| 8          | 1900                | 70                    | 3685022          | 0.999605  | >0.999999        |
| 12         | 200000              | 5500                  | 3685022          | 0.958016  | 0.999926         |

|    |          |         |         |          |          |
|----|----------|---------|---------|----------|----------|
| 24 | 850000   | 10000   | 3685022 | 0.82017  | 0.998954 |
| 36 | 4400000  | 420000  | 3685022 | 0.282827 | 0.810277 |
| 48 | 15000000 | 3300000 | 3685022 | 0.002014 | 0.012025 |

**Figure 3**

| <i>Hpi</i> | Mean PMA-U937 MOI=5 | Mean RAW264.7 MOI=5 | SE of Difference | P-value   | Adjusted P-value |
|------------|---------------------|---------------------|------------------|-----------|------------------|
| 2          | 25125               | 22229               | 2333279          | 0.999013  | 0.999981         |
| 4          | 25889               | 78433               | 2333279          | 0.982104  | 0.999981         |
| 6          | 120150              | 42362               | 2333279          | 0.973508  | 0.999981         |
| 8          | 16939492            | 199301              | 2333279          | <0.000001 | <0.000001        |

**Figure 4**

| <i>Total cells</i> | Mean PMA-U937 MOI=1 | Mean RAW264.7 MOI=1 | SE of Difference | P-value  | Adjusted P-value |
|--------------------|---------------------|---------------------|------------------|----------|------------------|
|                    | 9825                | 9802                | 85.87            | 0.791254 | 0.791254         |

**Figure 5**

| <i>Cytokine</i>               | Mean CHIKV Infected | Mean Mock Treated | SE of Difference | P-value   | Adjusted P-value |
|-------------------------------|---------------------|-------------------|------------------|-----------|------------------|
| <i>IL-1<math>\beta</math></i> | 1980                | 21.78             | 237.2            | <0.000001 | <0.000001        |
| <i>IL-6</i>                   | 2045                | 21.89             | 237.2            | <0.000001 | <0.000001        |
| <i>IL-8</i>                   | 3509                | 18.44             | 237.2            | <0.000001 | <0.000001        |
| <i>IL-10</i>                  | 514.8               | 29.11             | 237.2            | 0.043321  | 0.043321         |
| <i>IL-12p70</i>               | 2596                | 16.22             | 237.2            | <0.000001 | <0.000001        |
| <i>TNF</i>                    | 1288                | 37.33             | 237.2            | <0.000001 | 0.000002         |

**Figure 6**

| <i>Cytokine</i>                | Mean CHIKV Infected | Mean Mock Treated | SE of Difference | P-value   | Adjusted P-value |
|--------------------------------|---------------------|-------------------|------------------|-----------|------------------|
| <i>IFN-<math>\gamma</math></i> | 25.67               | 25.78             | 4.143            | 0.978933  | 0.978933         |
| <i>IL-6</i>                    | 26.11               | 21.56             | 4.517            | 0.328219  | 0.54871          |
| <i>IL-10</i>                   | 115.4               | 26.67             | 8.24             | <0.000001 | <0.000001        |

|                 |       |       |       |           |          |
|-----------------|-------|-------|-------|-----------|----------|
| <i>IL-12p70</i> | 688.3 | 25.11 | 153.4 | 0.000523  | 0.002092 |
| <i>MCP-1</i>    | 33.33 | 24.22 | 4.412 | 0.055515  | 0.157469 |
| <i>TNF</i>      | 47    | 21.89 | 3.089 | <0.000001 | 0.000002 |

**Figure 7**

| <i>Cytokine</i> | Mean PMA-U937 | Mean RAW264.7 | SE of Difference | P-value   | Adjusted P-value |
|-----------------|---------------|---------------|------------------|-----------|------------------|
| <i>IL-6</i>     | 2045          | 23.22         | 235.7            | <0.000001 | <0.000001        |
| <i>IL-10</i>    | 492.5         | 171.1         | 235.7            | 0.177368  | 0.177368         |
| <i>IL-12p70</i> | 2596          | 694.6         | 235.7            | <0.000001 | <0.000001        |
| <i>TNF</i>      | 1165          | 37            | 235.7            | 0.00001   | 0.000021         |

**Figure 8**

| <i>Cytokine</i>                | Mean PMA-U937 | Mean RAW264.7 | SE of Difference | P-value   | Adjusted P-value |
|--------------------------------|---------------|---------------|------------------|-----------|------------------|
| <i>IL-1</i>                    | 275.8         | 11.18         | 42.83            | <0.000001 | <0.000001        |
| <i>IL-6</i>                    | 251.2         | 1.14          | 42.83            | <0.000001 | <0.000001        |
| <i>IL-10</i>                   | 95.27         | 19.19         | 42.83            | 0.08014   | 0.08014          |
| <i>MCP-1</i>                   | 175.5         | 1.677         | 42.83            | 0.00013   | 0.00052          |
| <i>IFN-<math>\alpha</math></i> | 371.1         | 107.1         | 44.92            | <0.000001 | <0.000001        |
| <i>IFN-<math>\gamma</math></i> | 120.6         | 0.6283        | 42.83            | 0.006641  | 0.013239         |
| <i>TNF</i>                     | 161.3         | 4.833         | 44.92            | 0.000868  | 0.002603         |

**Figure 9**

|                                  | Mean PMA-U937 | Mean U937 | SE of Difference | P-value |        |
|----------------------------------|---------------|-----------|------------------|---------|--------|
| <i>PMA-treated U937 vs. U937</i> | 6.506         | 3.061     | 1.157            | 0.0318  | 0.0097 |
